# Supplementary material for: Mutual solubility of water and hydrophobic ionic liquids in the presence of hydrochloric acid
Source: Royal Society of Chemistry journal article supplement (doi:10.1039/c6ra06791c), 2016-01-01
Supplement: c6ra06791c1.pdf [file c6ra06791c1.pdf]

## Supplementary information

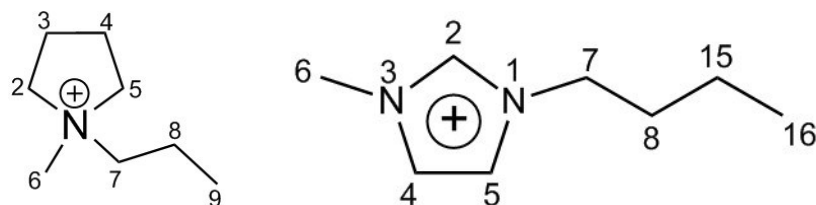

**Fig. S1** Chemical structures of [C<sub>1</sub>C<sub>3</sub>pyrr<sup>+</sup>] and [C<sub>4</sub>mim<sup>+</sup>] cations with numbering of carbon atoms.

| N° C | Number of protons | Multiplicity | Chemical shift (ppm) |
|------|-------------------|--------------|----------------------|
| 2-5  | 2 x 2             | multiplet    | 3.49                 |
| 7    | 2                 | triplet      | 3.28                 |
| 6    | 3                 | singlet      | 3.03                 |
| 3-4  | 2 x 2             | multiplet    | 2.20                 |
| 8    | 2                 | multiplet    | 1.81                 |
| 9    | 3                 | triplet      | 0.97                 |

**Table S1** Peak assignments of the <sup>1</sup>H-NMR spectrum of [C<sub>1</sub>C<sub>3</sub>pyrr<sup>+</sup>] cation.
